# Supplementary material
Source: ML conference proceedings conference paper supplement (https://openaccess.thecvf.com/content/CVPR2021/html/Hu_Safe_Local_Motion_CVPR_2021_paper.html)
Supplement: Supplementary file 2 [file Hu_Safe_Local_Motion_CVPR_2021_supplemental.zip]

Archive with 5 entries (5 files):
- carla_failures.mp4
- carla_turn.mp4
- nuscenes_1.mp4
- nuscenes_2.mp4
- supp.pdf
